# Supplementary material
Source: PubMed Central journal article supplement (PMC8609078)

# Supplemental Figure 1

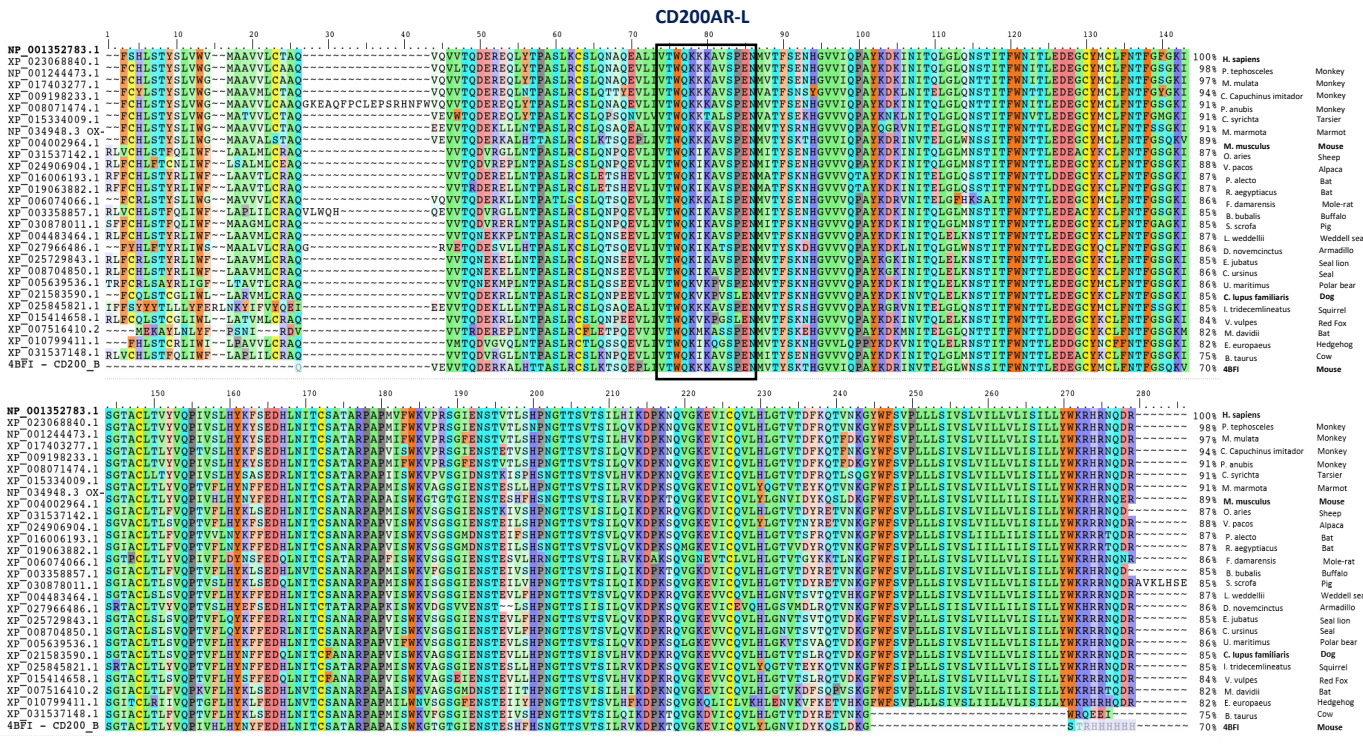

# Supplemental Figure 2

**A**

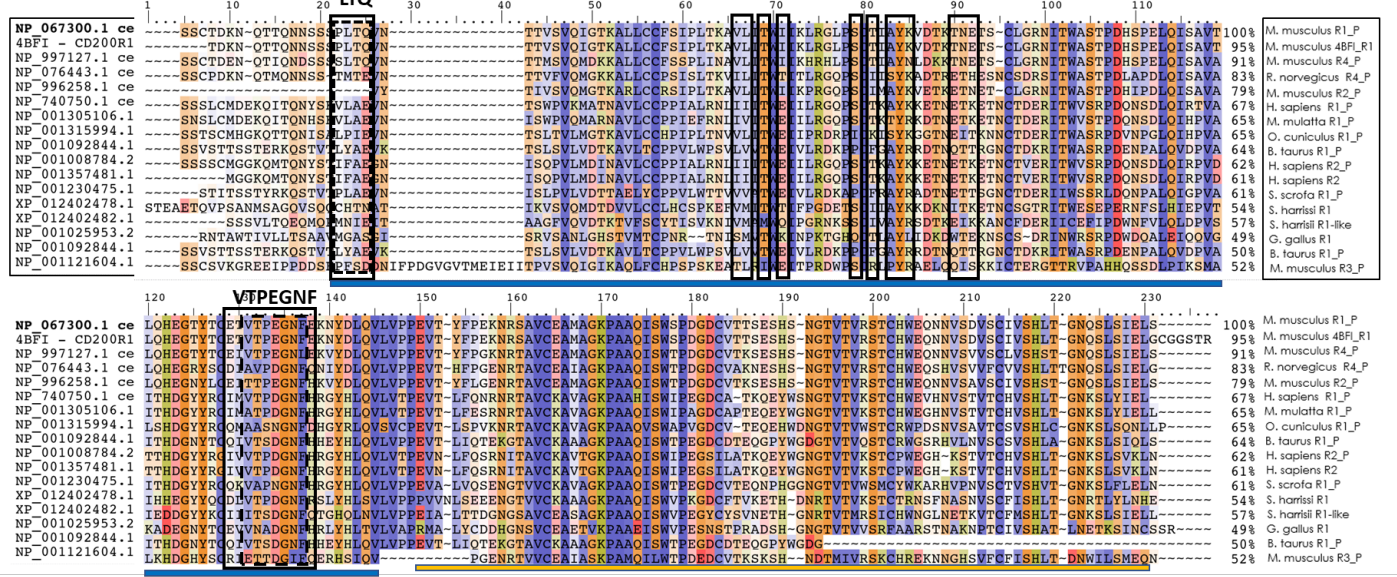

CD200 binding site boxed in solid line. CD200AR-L boxed in dashed line.

**B**

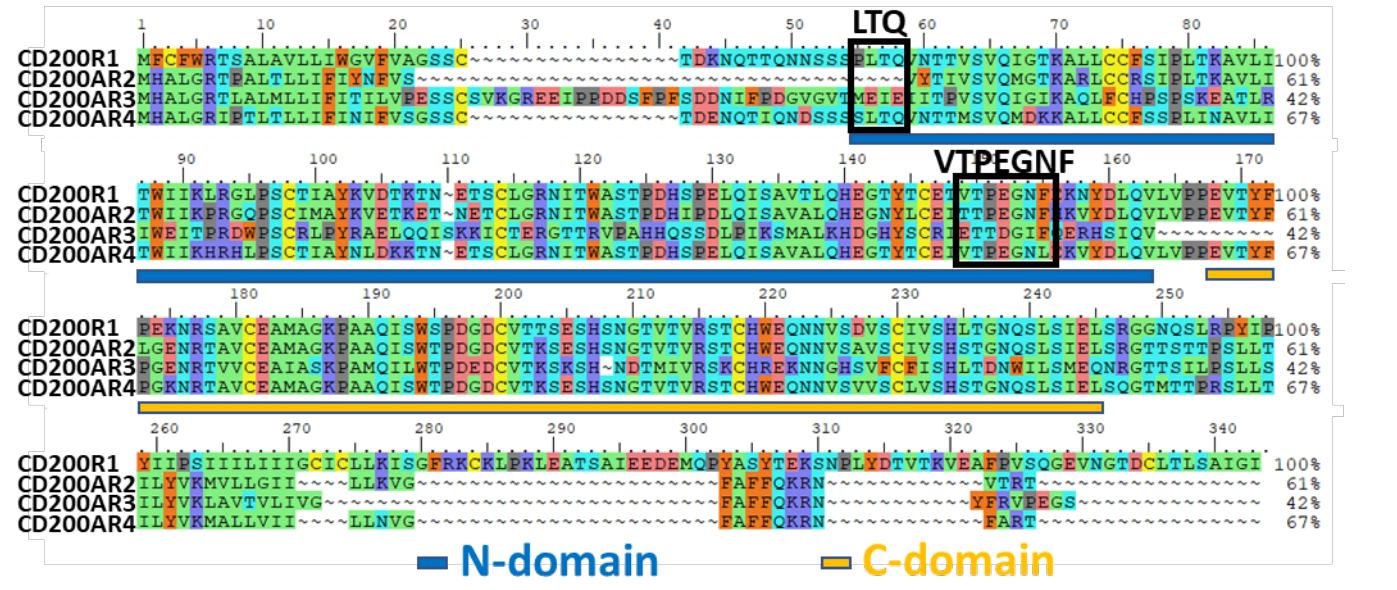

Supplemental Figure 3

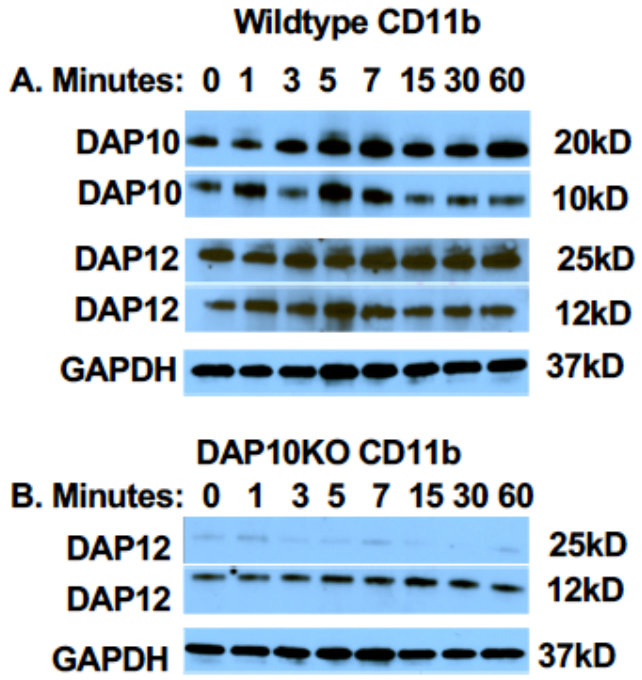

# Supplemental Figure 4

**A**

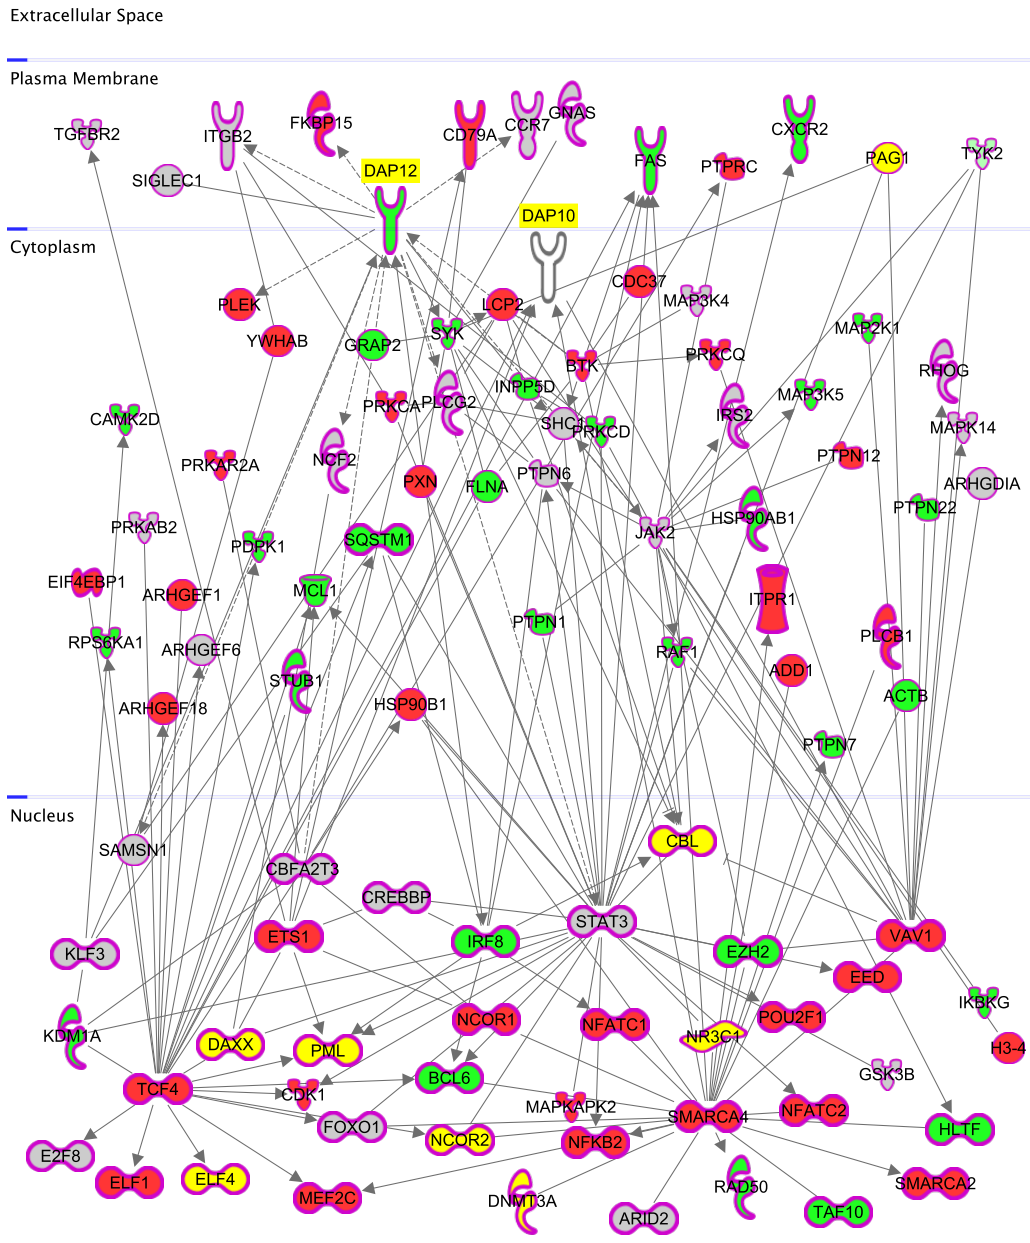

**B**

| Protein Name | mPIA12 |
|--------------|--------|
| 14-3-3 beta  | Red    |
| 4E-BP1       | Red    |
| ADD1         | Red    |
| ARHGEF1 iso5 | Red    |
| ARHGEF18     | Red    |
| Btk          | Red    |
| CD45         | Red    |
| CDC37        | Red    |
| CDK1         | Red    |
| EED          | Red    |
| Elf-1        | Red    |
| Ets-1        | Red    |
| FKBP15       | Red    |
| GRP94        | Red    |
| Ig-alpha     | Red    |
| IP3R1        | Red    |
| MAPKAPK2     | Red    |
| MEF2C        | Red    |
| N-CoR1       | Red    |
| NFAT1        | Red    |
| NFAT2        | Red    |
| NFKB-p100    | Red    |
| Oct1         | Red    |
| PKAR2A       | Red    |
| PKCA         | Red    |
| PKCT         | Red    |
| PLCB1        | Red    |
| pleckstrin   | Red    |
| PTP-PEST     | Red    |
| PXN          | Red    |
| SLP76        | Red    |
| SMARCA2      | Red    |
| SMARCA4      | Red    |
| TCF4         | Red    |
| VAV1         | Red    |
| CBL          | Yellow |
| DAXX         | Yellow |
| DNMT3A       | Yellow |
| ELF4         | Yellow |
| GR           | Yellow |
| PAG          | Yellow |
| PML          | Yellow |
| SMRT         | Yellow |
| Tyk2         | Yellow |
| ACTB         | Green  |
| ASK1         | Green  |
| Bcl-6        | Green  |
| CAMK2D       | Green  |
| CHIP         | Green  |
| EZH2         | Green  |
| FAS          | Green  |
| FLNA         | Green  |
| GADS         | Green  |
| HePTP        | Green  |
| HSP90B       | Green  |
| IKKG         | Green  |
| IL8RB        | Green  |
| IRF8         | Green  |
| LSD1         | Green  |
| MCL1         | Green  |
| MEK1         | Green  |
| p90RSK       | Green  |
| PDK1         | Green  |
| PKCD         | Green  |
| PTP1B        | Green  |
| PTPN22       | Green  |
| RAD50        | Green  |
| RAF1         | Green  |
| SHIP         | Green  |
| SMARCA3      | Green  |
| SQSTM1       | Green  |
| Syk          | Green  |
| TAF10        | Green  |
| TYROBP       | Green  |

Supplemental Figure 5

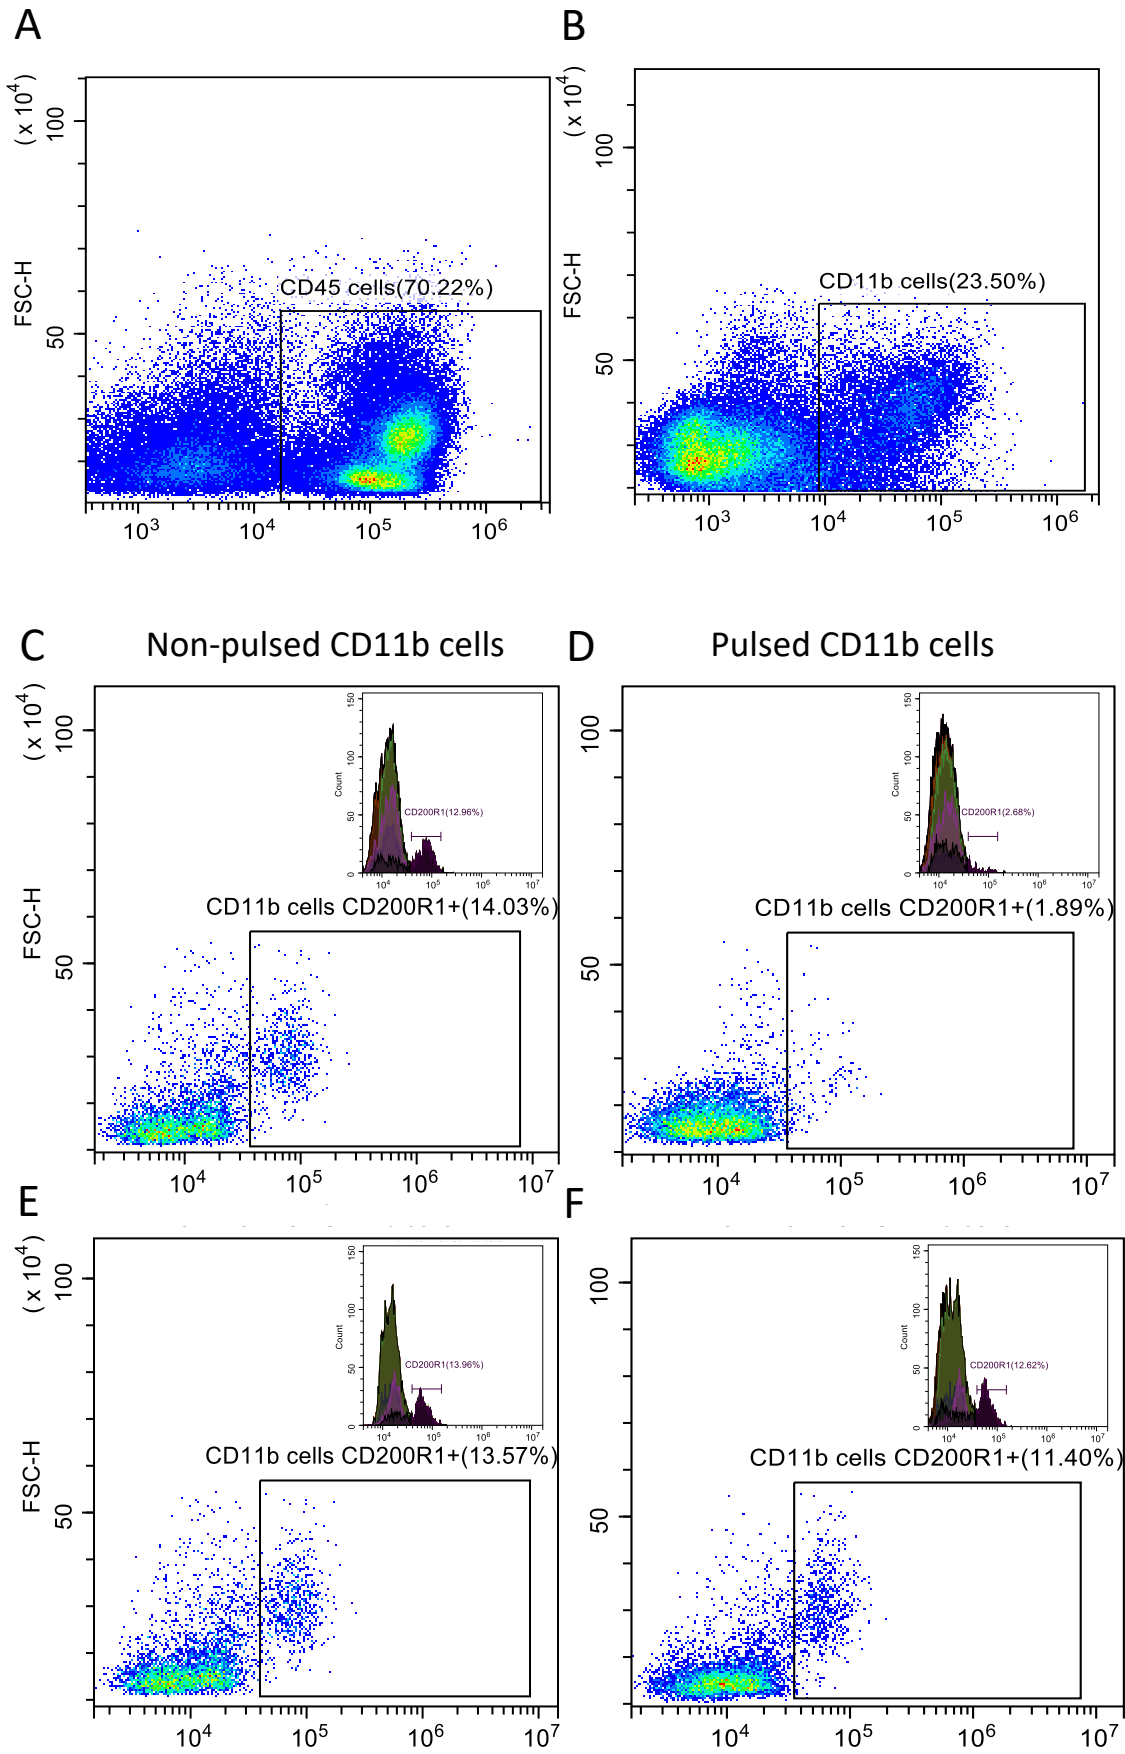

Supplement: 13311_2021_1038_MOESM10_ESM.pdf [file 13311_2021_1038_MOESM10_ESM.pdf]
